# Supplementary material for: FOXC2 Disease Mutations Identified in Lymphedema Distichiasis Patients Impair Transcriptional Activity and Cell Proliferation
Source: PubMed Central journal article supplement (PMC7404146; doi:10.3390/ijms21145112), 2020-07-20
Supplement: ijms-21-05112-s001.pdf [file ijms-21-05112-s001.pdf]

Supplementary Table 1

| <b>Primer name</b>   | <b>Sequence</b>                |
|----------------------|--------------------------------|
| FOXC2(L80F)-F        | ACAGCTACATCGCGTTCATCACCATGGCC  |
| FOXC2(L80F)-R        | GGCCATGGTGATGAACGCGATGTAGCTGT  |
| FOXC2(Y109*)-F       | CGCTTCCCCTTCTAACGGGAGAACAAGCAG |
| FOXC2(Y109*)-R       | CTGCTTGTTCTCCCGTTAGAAGGGGAAGCG |
| FOXC2(H199Pfs264*)-F | CGGCCACCCCCCACCTAGCGGAC        |
| FOXC2(H199Pfs264*)-R | GTCCGCTAGGTGGGGGGGTGGCCG       |
| FOXC2(I213V)-F       | AGAAGAAGGTGGTGGTCAAGAGCGAGGCGG |
| FOXC2(I213V)-R       | CCGCCTCGCTCTTGACCACCACCTTCTTCT |
| FOXC2(I213Tfa18*)-F  | GAAGAAGGTGGTGACAAGAGCGAGGCGG   |
| FOXC2(I213Tfa18*)-R  | CCGCCTCGCTCTTGTCACCACCTTCTTC   |
| FOXC2(V228M)-F       | CGGTCATCACCAAGATGGAGACGCTGAGC  |
| FOXC2(V228M)-R       | GCTCAGCGTCTCCATCTTGGTGATGACCG  |

## Supplementary Figure 1

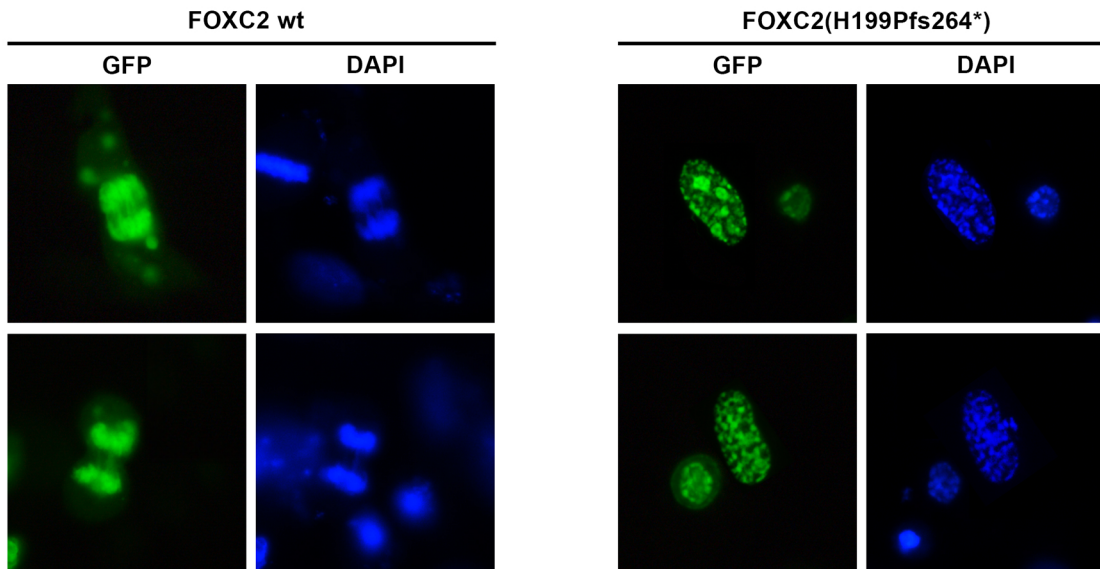

### Supplementary Figure 1. Mitotic detection in HeLa cells transiently transfected with *FOXC2*-GFP and *FOXC2*(H199Pfs264\*)-GFP plasmid

Immunofluorescence analysis shows a high number of mitotic cells, 72 h after transient transfection with *FOXC2*-GFP plasmid (left panel). On the contrary, severe decrease of mitosis and abnormal nuclear morphology is detected at 72 h post-transfection with *FOXC2*(H199Pfs264\*)-GFP plasmid (right panel). Fluorescence of *FOXC2*-GFP recombinant proteins were in green. DAPI was used to stain nuclei (in blue). Images were at 40X magnification.
